# Supplementary material
Source: publisher site journal article supplement (https://www.dovepress.com/article/319084)
Supplement: Supplementary file 1 [file get_supplementary_file.php]

Supplementary Material

# Supplementary Data. Questionnaire for both groups of experts.

***GENERAL:***

1. Is the patient responsible for the poor adherence to their treatments?
2. Are healthcare personnel responsible for patients’ poor adherence to their treatments?

***TRAINING:***

1. Is the lack of education on therapeutic adherence in the undergraduate curriculum of healthcare professionals a cause of not achieving good control of chronic pathology?
2. Is the lack of continued education on therapeutic adherence at the post-graduate level of healthcare professionals a cause of not achieving good control of chronic pathology?

***PATIENT:***

1. Is the patient’s perception of the ineffectiveness of the treatment a cause of poor adherence to treatments?
2. Is the patient’s perception of the need for the treatment a cause of poor adherence to treatments?
3. Are problems due to denial or incorrect or alternative beliefs causes for poor adherence to treatments?
4. Are the patient’s lack of motivation or passive attitude about treatment causes for poor adherence?
5. Is forgetfulness regarding taking medication a cause of poor adherence in chronic and elderly patients?
6. Is the patient’s not knowing the aims of proper monitoring one of the reasons that treatment is not done correctly, and also a cause of poor adherence with therapeutic treatment?

***STRUCTURE AND HEALTHCARE:***

1. Is the belief of healthcare professionals that poor adherence can be a cause of poor monitoring a cause for patients’ poor adherence?
2. Is the lack of clear and simple information regarding the treatment instructions for the patient or their family a cause of poor adherence to treatment?
3. Is the lack of interprofessional communication in the clinical practice a cause for poor adherence?
4. Is the lack of communication with pharmacy offices/community pharmacies a cause of poor adherence to treatment?
5. Are negative messages from healthcare professionals when patients do not adhere to treatment a cause of poor adherence to treatment?
6. Is a non-empathetic, poorly communicated interview with the patient a cause of poor adherence to treatment?
7. Is the lack of shared decision making a cause of poor adherence to treatment?
8. Is the healthcare professional’s lack of measuring adherence in clinical practice a cause of poor adherence to treatment?
9. Is the lack of in-person time to explore patent adherence a cause of poor adherence?
10. Are the high volume of patients and delay in appointments causes of poor adherence?
11. Is not having a clinical practice action protocol for poor adherence to treatments a cause for not obtaining follow up with patients?

***TREATMENTS:***

1. Are polymedication and therapeutic complexity a cause of poor adherence in chronic patients?
2. Are possible side effects to medication and/or the fear of their occurrence a cause for not obtaining adherence to treatment, especially in multi-pathology patients?
3. Is the difficulty of undertaking health-dietary measures regularly a cause of poor adherence to treatment?
4. Is the cost of treatment a cause for poor adherence?

***DISEASE:***

1. Are diseases with little or no symptomology a cause of poor adherence to treatment?
2. Are the lack of correct understanding and perception of the disease and its treatment causes of poor adherence to treatment?

***SOCIO-HEALTH ENVIRONMENT:***

1. Is the lack of social-employment support a cause of poor adherence to treatment?
2. Is the lack of family support a cause of poor adherence to treatment?
